# Supplementary material
Source: PubMed Central journal article supplement (PMC8740959)
Supplement: NIHMS1543384-supplement-1.pdf [file NIHMS1543384-supplement-1.pdf]

Figure S1

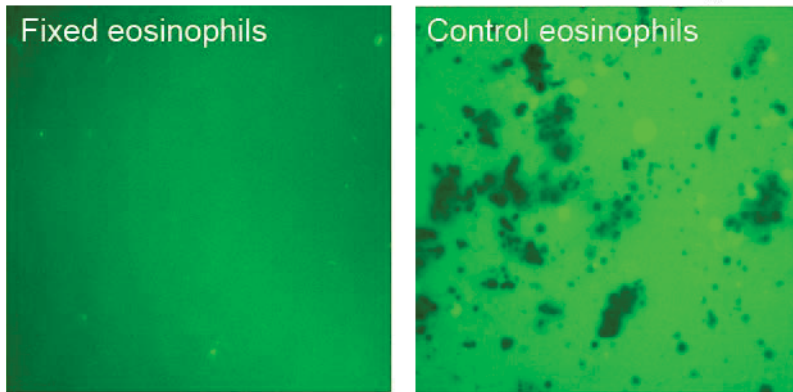

**Figure S1.** Images comparing lack of substrate degradation when fixed eosinophils were added to fibrinogen substrate for 4 hours (left) with substrate degradation from live eosinophils (right)

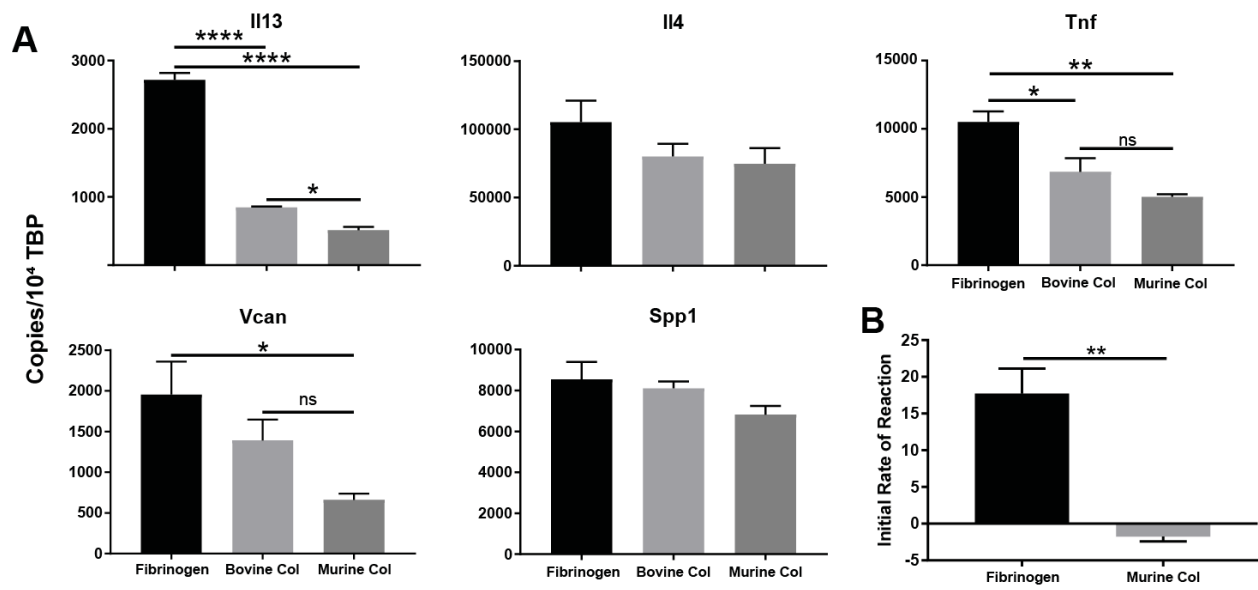

**Figure S2.** A) Bar graphs showing gene expression comparison between bovine and murine collagen relative to murine fibrinogen. \* $p < 0.5$ , \*\* $p < 0.01$ , \*\*\* $p < 0.001$ , \*\*\*\* $p < 0.0001$  by one-way ANOVA. B) Biolog metabolic assay comparing metabolic activity of eosinophils exposed to murine fibrinogen vs eosinophils exposed to murine collagen. \*\* $p < 0.01$  by t-test.

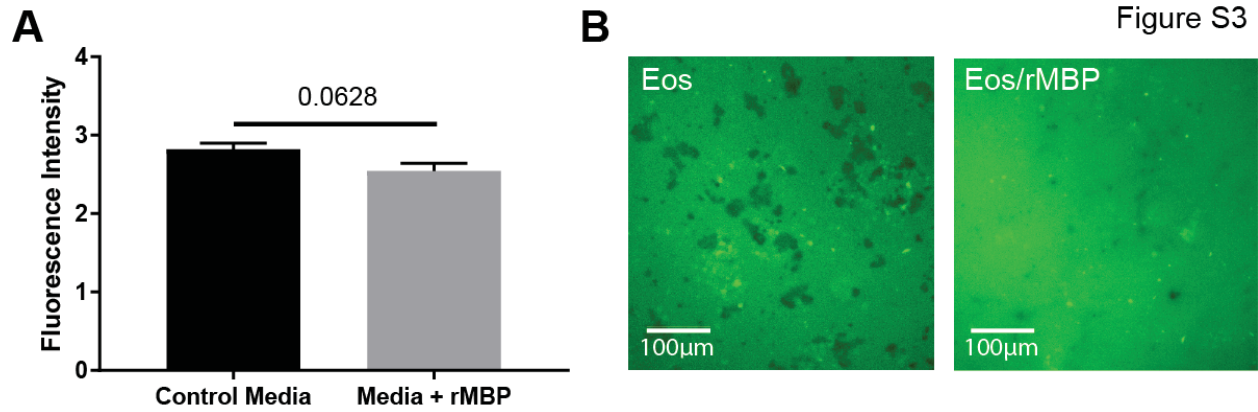

**Figure S3.** A) Bar graph showing fluorescence intensity of FITC-linked fibrinogen exposed only to cell media control vs. cell media plus 1  $\mu\text{g}/\text{mL}$  rMBP.  $p=0.0628$  by t-test,  $n=4$ . B) Visualization of addition of eosinophils with no treatment (left) as compared to those treated with 1  $\mu\text{g}/\text{mL}$  rMBP (right). Images representative of 3 replicates, from which at least 4 fields were imaged.

| Mass spectrometry data comparing fibrinogen background control (no eosinophils added) to fibrinogen plus eosinophils |                                   |                                  |          |                 |                       |                   |                                                |                   |                             |                   |
|----------------------------------------------------------------------------------------------------------------------|-----------------------------------|----------------------------------|----------|-----------------|-----------------------|-------------------|------------------------------------------------|-------------------|-----------------------------|-------------------|
| Protein IDs                                                                                                          | Protein names                     | Gene names                       | Peptides | Unique peptides | Sequence coverage [%] | Mol. weight [kDa] | Fibrinogen only control (no eosinophils added) |                   | Fibrinogen plus eosinophils |                   |
|                                                                                                                      |                                   |                                  |          |                 |                       |                   | LFQ intensity NoEos                            | LFQ intensity Eos | LFQ intensity Eos           | LFQ intensity Eos |
| COHKE9;COHKE8;COHKE7;COHKE6                                                                                          | Histone H2A type 1-H;Histone H2   | Hist1h2ah;H2afj;Hist2h2ac;Hist1h | 2        | 2               | 21.5                  | 14.135            | 0                                              | 0                 | 0                           | 37034000          |
| E9PV24                                                                                                               | Fibrinogen alpha chain;Fibrinope  | Fga                              | 4        | 4               | 7.9                   | 87.428            | 70775000                                       | 67089000          | 60481000                    | 87700000          |
| P18760;P45591                                                                                                        | Cofilin-1;Cofilin-2               | Cfl1;Cfl2                        | 2        | 2               | 23.5                  | 18.559            | 0                                              | 0                 | 27905000                    | 42121000          |
| P49290                                                                                                               | Eosinophil peroxidase;Eosinophil  | Epx                              | 4        | 4               | 6.6                   | 81.379            | 0                                              | 0                 | 81637000                    | 95396000          |
| P63260;P60710;P63268;P68134;P                                                                                        | Actin, cytoplasmic 2;Actin, cytop | Actg1;Actb;Actg2;Acta1;Actc1;Act | 4        | 4               | 14.7                  | 41.792            | 74386000                                       | 102690000         | 285130000                   | 718610000         |
| Q61878                                                                                                               | Bone marrow proteoglycan;Eosin    | Prp2                             | 2        | 2               | 14.3                  | 24.255            | 0                                              | 0                 | 61286000                    | 84531000          |
| Q8K0E8;CON_P02676                                                                                                    | Fibrinogen beta chain;Fibrinopept | Fgb                              | 3        | 3               | 10.2                  | 54.752            | 0                                              | 0                 | 31581000                    | 42767000          |
| Q8VCM7                                                                                                               | Fibrinogen gamma chain            | Fgg                              | 2        | 2               | 7.1                   | 49.391            | 24179000                                       | 25068000          | 28231000                    | 36111000          |

**Table S1.** Mass spectrometry data comparing fibrinogen background control (no eosinophils added) to fibrinogen plus eosinophils. LFQ = label free quantification, NoEos = fibrinogen only background control, Eos = fibrinogen plus eosinophils.
